# Supplementary material for: Imidazole-amino acids. Conformational switch under tautomer and pH change
Source: PubMed Central journal article supplement (PMC9877100; doi:10.1007/s00726-022-03201-0), 2022-11-02
Supplement: 726_2022_3201_MOESM1_ESM.pdf [file 726_2022_3201_MOESM1_ESM.pdf]

## SUPPORTING INFORMATION for

### Imidazole-amino acids. Conformational switch under tautomer and pH change

Monika Staś\*, Piotr Najgebauer, Dawid Siodlak

Faculty of Chemistry, University of Opole, Opole 45-052, Poland

e-mail: [mstas@uni.opole.pl](mailto:mstas@uni.opole.pl)

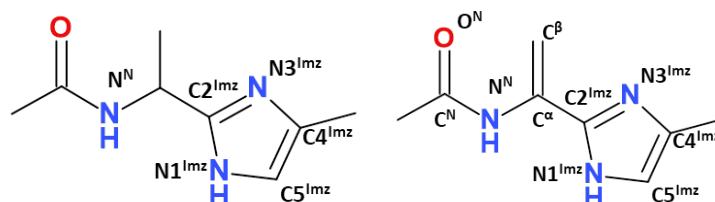

**Fig. S1** Schematic formula of imidazole-alanine and imidazole-dehydroalanine with atoms notation

**Table S1** Structural parameters for the internal X-H...A (X = N, C; A = O, N) hydrogen bond; H...A ≤ 2.7 Å and X-H...A > 90° according to Ref. (Vargas et al. 2002), at the M06-2X/6-311++G(d,p) conformers for the molecules **1**, **2**, **3** and **4** in water

| Conformer Code                     | Ac-L-Ala-[psi]Imz-4-Me $\tau$ (1) |           |                |           | Ac-L-Ala-[psi]Imz-5-Me $\pi$ (2) |        |        |              |               | Ac-L-Ala-[psi](Imz) <sup>-</sup> -4-Me (3) |       |               |       |                | Ac-L-Ala-[psi](Imz) <sup>-</sup> -4-Me (4) |                                         |           |               |                |
|------------------------------------|-----------------------------------|-----------|----------------|-----------|----------------------------------|--------|--------|--------------|---------------|--------------------------------------------|-------|---------------|-------|----------------|--------------------------------------------|-----------------------------------------|-----------|---------------|----------------|
|                                    | $\alpha R\tau$                    | $\beta 2$ | $\alpha L\tau$ | $\alpha'$ | C7eq                             | C7ax   | C5     | $\beta 2\pi$ | $\alpha L\pi$ | $\alpha R\tau$                             | C7eq  | $\alpha L\pi$ | C7ax  | $\alpha L\tau$ | $\alpha D\tau$                             | C5                                      | $\beta 2$ | $\alpha L\pi$ | $\alpha D\tau$ |
| N <sup>N</sup> -H...X              |                                   |           |                |           | X=N3 <sup>Imz</sup>              |        |        |              |               |                                            |       |               |       |                |                                            | X=N3 <sup>Imz</sup> X=N1 <sup>Imz</sup> |           |               |                |
| r H...X                            |                                   |           |                |           |                                  |        | 2.32   |              |               |                                            |       |               |       |                |                                            | 2.32                                    | 2.35      |               |                |
| r N...X                            |                                   |           |                |           |                                  |        | 2.76   |              |               |                                            |       |               |       |                |                                            | 2.77                                    | 2.79      |               |                |
| N-H...X                            |                                   |           |                |           |                                  |        | 104.61 |              |               |                                            |       |               |       |                |                                            | 105.9                                   | 105.5     |               |                |
| ∠H...X-C2 <sup>Imz</sup>           |                                   |           |                |           |                                  |        | 80.60  |              |               |                                            |       |               |       |                |                                            | 80.6                                    | 79.7      |               |                |
| O...H-NY <sup>Imz</sup>            | Y=3                               |           | Y=3            |           | Y=1                              | Y=1    |        |              |               | Y=3                                        | Y=1   |               | Y=1   | Y=3            |                                            |                                         |           |               |                |
| r H...Y                            | 2.16                              |           | 2.06           |           | 2.16                             | 2.06   |        |              |               | 2.08                                       | 2.08  |               | 1.99  | 1.98           |                                            |                                         |           |               |                |
| r N...Y                            | 2.92                              |           | 2.84           |           | 2.92                             | 2.84   |        |              |               | 2.84                                       | 2.85  |               | 2.78  | 2.77           |                                            |                                         |           |               |                |
| ∠O...H-NY <sup>Imz</sup>           | 130.5                             |           | 132.0          |           |                                  |        |        |              |               | 130.3                                      | 15.8  |               | 132.1 | 132.1          |                                            |                                         |           |               |                |
| ∠C=O...H <sup>I</sup>              | 107.8                             |           | 113.3          |           | 130.51                           | 131.37 |        |              |               | 111.8                                      | 11.4  |               | 116.2 | 116.5          |                                            |                                         |           |               |                |
| C <sup>α</sup> -H...O <sup>N</sup> |                                   |           |                |           |                                  |        |        |              |               |                                            |       |               |       |                |                                            |                                         |           |               |                |
| r H...O                            | 2.54                              | 2.33      | 2.52           |           | 2.54                             |        | 2.57   | 2.50         |               |                                            |       |               |       |                |                                            |                                         |           |               |                |
| r C...O                            | 2.80                              | 2.76      | 2.79           |           | 2.80                             |        | 2.79   | 2.79         |               |                                            |       |               |       |                |                                            |                                         |           |               |                |
| ∠C-H...O                           | 92.1                              | 104.5     | 92.7           |           | 92.25                            |        | 89.52  | 93.79        |               |                                            |       |               |       |                |                                            |                                         |           |               |                |
| ∠C=O...H                           | 79.4                              | 80.6      | 80.3           |           | 79.43                            |        | 79.04  | 80.57        |               |                                            |       |               |       |                |                                            |                                         |           |               |                |
| C <sup>β</sup> -H...O <sup>N</sup> |                                   |           |                |           |                                  |        |        |              |               |                                            |       |               |       |                |                                            |                                         |           |               |                |
| r H...O                            |                                   |           | 2.52           |           | -                                | 2.53   | 2.72   | 2.65         |               |                                            | 2.65  | 2.52          |       | 2.64           |                                            |                                         |           | 2.70          | 2.70           |
| r C...O                            |                                   |           | 3.08           |           | -                                | 3.09   | 3.26   | 3.19         |               |                                            | 3.18  | 2.78          |       | 3.17           |                                            |                                         |           | 3.23          | 3.23           |
| ∠C-H...O                           |                                   |           | 110.8          |           | -                                | 110.66 | 110.02 | 110.03       |               |                                            | 109.2 | 132.1         |       | 109.3          |                                            |                                         |           | 109.7         | 109.6          |
| ∠C=O...H                           |                                   |           | 97.5           |           | -                                | 97.52  | 88.10  | 92.97        |               |                                            | 92.6  | 116.2         |       | 92.7           |                                            |                                         |           | 91.8          | 91.7           |

**Table S2** Structural parameters for the internal X-H...A (X = N, C; A = O, N) hydrogen bond; H...A ≤ 2.7 Å and X-H...A > 90 ° according to Ref. (Vargas et al. 2002), at the M06-2X/6-311++G(d,p) conformers for the molecules **5, 6, 7** and **8** in water

| Conformer Code                        | Ac-ΔAla-[psi]Imz-4-Me<br>τ (5) |       | Ac-ΔAla-[psi]Imz-5-Me<br>π (6) |        | Ac-ΔAla-[psi](Imz) <sup>+</sup> -4-Me<br>(7) |      |       | Ac-ΔAla-[psi](Imz) <sup>-</sup> -4-Me<br>(8) |       |
|---------------------------------------|--------------------------------|-------|--------------------------------|--------|----------------------------------------------|------|-------|----------------------------------------------|-------|
|                                       | β2                             | C5    | C5                             | β2     | C5                                           | β2   | αD    | C7                                           | β2    |
| N <sup>N</sup> -H...X                 | X=N1 <sup>Imz</sup>            |       | X=N3 <sup>Imz</sup>            |        | X=N1 <sup>Imz</sup>                          |      |       | X=N1 <sup>Imz</sup>                          |       |
| r H...X                               | 2.21                           |       | 2.22                           | 2.67   |                                              |      | 1.92  | 2.14                                         | 2.14  |
| r N...X                               | 2.72                           |       | 2.73                           | 2.84   |                                              |      | 2.73  | 2.69                                         | 2.69  |
| ∠N-H...X                              | 109.6                          |       | 109.3                          | 88.98  |                                              |      | 134.6 | 111.8                                        | 111.6 |
| ∠H...X-C2 <sup>Imz</sup>              | 81.1                           |       | 80.73                          | 71.78  |                                              |      | 112.0 | 82.8                                         | 82.8  |
| O...H-NY <sup>Imz</sup>               |                                |       |                                |        | Y=3                                          |      |       |                                              |       |
| r H...Y                               |                                |       |                                |        |                                              |      | 1.91  |                                              |       |
| r N...Y                               |                                |       |                                |        |                                              |      | 2.73  |                                              |       |
| ∠O...H-NY <sup>Imz</sup>              |                                |       |                                |        |                                              |      | 134.7 |                                              |       |
| ∠C=O...H <sup>l</sup>                 |                                |       |                                |        |                                              |      | 112.2 |                                              |       |
| C <sup>β</sup> -H...O <sup>N</sup>    |                                |       |                                |        |                                              |      |       |                                              |       |
| r H...O                               | 2.27                           | 2.50  |                                | 2.53   | 2.54                                         | 2.57 |       | 2.29                                         | 2.29  |
| r C...O                               | 2.89                           | 2.94  |                                | 2.95   | 2.94                                         | 2.95 |       | 2.91                                         | 2.91  |
| ∠C-H...O                              | 114.8                          | 103.3 |                                | 101.88 | 100.9                                        | 99.5 |       | 114.9                                        | 114.8 |
| ∠C=O...H                              | 104.9                          | 95.3  |                                | 94.01  | 94.5                                         | 93.3 |       | 103.9                                        | 104.1 |
| N <sup>N</sup> ...H-NY <sup>Imz</sup> |                                |       |                                | Y=1    |                                              |      |       |                                              |       |
| r H...Y                               |                                |       |                                | 2.66   |                                              |      |       |                                              |       |
| r N...Y                               |                                |       |                                | 2.84   |                                              |      |       |                                              |       |
| ∠N...H-NY <sup>Imz</sup>              |                                |       |                                | 89.89  |                                              |      |       |                                              |       |
| ∠C <sup>α</sup> -N...H <sup>l</sup>   |                                |       |                                | 80.34  |                                              |      |       |                                              |       |

**Table S3** Structural parameters for the internal C=O ►...◄ C=O interactions; C...O < 3.6Å according to Ref. (Allen et al. 1998), at the M06-2X/6-311++G(d,p) conformers for the molecules **1,2,3** and **4** in water

| Conformer Code                            | Ac-L-Ala-[psi]Imz-4-Me, τ (1) |      | Ac-L-Ala-[psi]Imz-5-Me, π (2) |       |       |       | Ac-L-Ala-[psi](Imz) <sup>+</sup> -4-Me (3) |      |      |      | Ac-L-Ala-[psi](Imz) <sup>-</sup> -4-Me (4) |       |      |
|-------------------------------------------|-------------------------------|------|-------------------------------|-------|-------|-------|--------------------------------------------|------|------|------|--------------------------------------------|-------|------|
|                                           | β                             | αDτ  | C7eq                          | αRπ   | C7ax  | αLp   | β                                          | αRπ  | αLπ  | αDτ  | β                                          | αLπ   |      |
| O <sup>N</sup> ...C2 <sup>Imz</sup>       | Y=3                           | Y=3  | Y=1                           | Y=1   | Y=3   | Y=3   | Y=3                                        | Y=1  | Y=1  | Y=3  | Y=3                                        | Y=1   | Y=3  |
| C <sup>N</sup> ...NY <sup>Imz</sup>       | -                             | -    | 3.25                          | 3.32  | 3.25  | 3.26  | -                                          | -    | -    | -    | -                                          | 3.44  | 3.50 |
| C <sup>N</sup> ...C2 <sup>Imz</sup>       | 3.05                          | 3.02 | 3.18                          | 3.04  | 3.18  | 3.02  | 3.00                                       | 2.99 | 2.95 | 2.96 | -                                          | 3.05  | 3.06 |
| O <sup>N</sup> ...NY <sup>Imz</sup>       | -                             | -    | 2.92                          | 3.43  | 2.92  | 3.28  | -                                          | -    | -    | -    | -                                          | 3.52  | 3.59 |
| ∠(C=O) <sup>N</sup> ...C2 <sup>Imz</sup>  | 79.5                          | 81.4 | 75.45                         | 79.93 | 75.45 | 81.84 | 81.3                                       | 81.8 | 83.9 | 83.9 | 80.5                                       | 80.6  |      |
| ∠(C2=NY) <sup>Imz</sup> ...C <sup>N</sup> | 66.8                          | 68.8 | 75.07                         | 66.61 | 75.07 | 67.62 | 64.6                                       | 63.4 | 63.6 | 64.6 | 62.1                                       | 60.0  |      |
| ∠NY <sup>Imz</sup> ...C(=O) <sup>N</sup>  | 85.3                          | 80.0 | 63.89                         | 84.55 | 63.89 | 79.90 | 81.6                                       | 81.3 | 76.8 | 76.4 | 83.7                                       | 84.2  |      |
| ∠O <sup>N</sup> ...(C2=NY) <sup>Imz</sup> | 96.3                          | 90.6 | 63.73                         | 96.1  | 63.73 | 92.10 | 97.5                                       | 99.0 | 96.1 | 94.6 | 101.6                                      | 104.9 |      |

**Table S4** Structural parameters for the internal C=O ►...◄ C=O interactions; C...O < 3.6Å according to Ref. (Allen et al. 1998), at the M06-2X/6-311++G(d,p) conformers for the molecules **1,2,3** and **4** in water

| Conformer Code                            | Ac-ΔAla-[psi]Imz-4-Me<br>τ(5) |      | Ac-ΔAla-[psi]Imz-5-Me<br>π(6) |      | Ac-ΔAla-[psi](Imz) <sup>+</sup> -4-Me<br>(7) |      |      | Ac-ΔAla-[psi](Imz) <sup>-</sup> -4-Me<br>(8) |  |
|-------------------------------------------|-------------------------------|------|-------------------------------|------|----------------------------------------------|------|------|----------------------------------------------|--|
|                                           | α                             | β    | β                             | α    | α                                            | β    | β    | α                                            |  |
| O <sup>N</sup> ...C2 <sup>Imz</sup>       | Y=1                           | Y=3  | Y=3                           | Y=1  | Y=1                                          | Y=3  | Y=3  | Y=1                                          |  |
| C <sup>N</sup> ...NY <sup>Imz</sup>       | 2.95                          | 2.96 | 2.87                          | 3.04 | 3.04                                         | 3.05 | 2.87 | 2.86                                         |  |
| C <sup>N</sup> ...C2 <sup>Imz</sup>       | 3.28                          | -    | -                             | 3.25 | 3.25                                         | 3.24 | -    | -                                            |  |
| O <sup>N</sup> ...NY <sup>Imz</sup>       | 3.03                          | 3.05 | 3.00                          | 3.08 | 3.08                                         | 3.08 | 3.00 | 3.00                                         |  |
| ∠(C=O) <sup>N</sup> ...C2 <sup>Imz</sup>  | 3.22                          | -    | -                             | 3.24 | 3.24                                         | 3.25 | -    | -                                            |  |
| ∠(C2=NY) <sup>Imz</sup> ...C <sup>N</sup> | 82.0                          | 82.5 | 84.1                          | 80.3 | 80.3                                         | 79.9 | 84.1 | 84.3                                         |  |
| ∠NY <sup>Imz</sup> ...C(=O) <sup>N</sup>  | 67.6                          | 71.6 | 68.5                          | 70.9 | 70.9                                         | 71.2 | 68.5 | 68.3                                         |  |
| ∠O <sup>N</sup> ...(C2=NY) <sup>Imz</sup> | 76.2                          | 75.0 | 85.3                          | 78.9 | 78.9                                         | 79.6 | 85.3 | 71.9                                         |  |
|                                           | 89.3                          | 83.5 | 86.2                          | 86.3 | 86.3                                         | 86.3 | 86.2 | 86                                           |  |

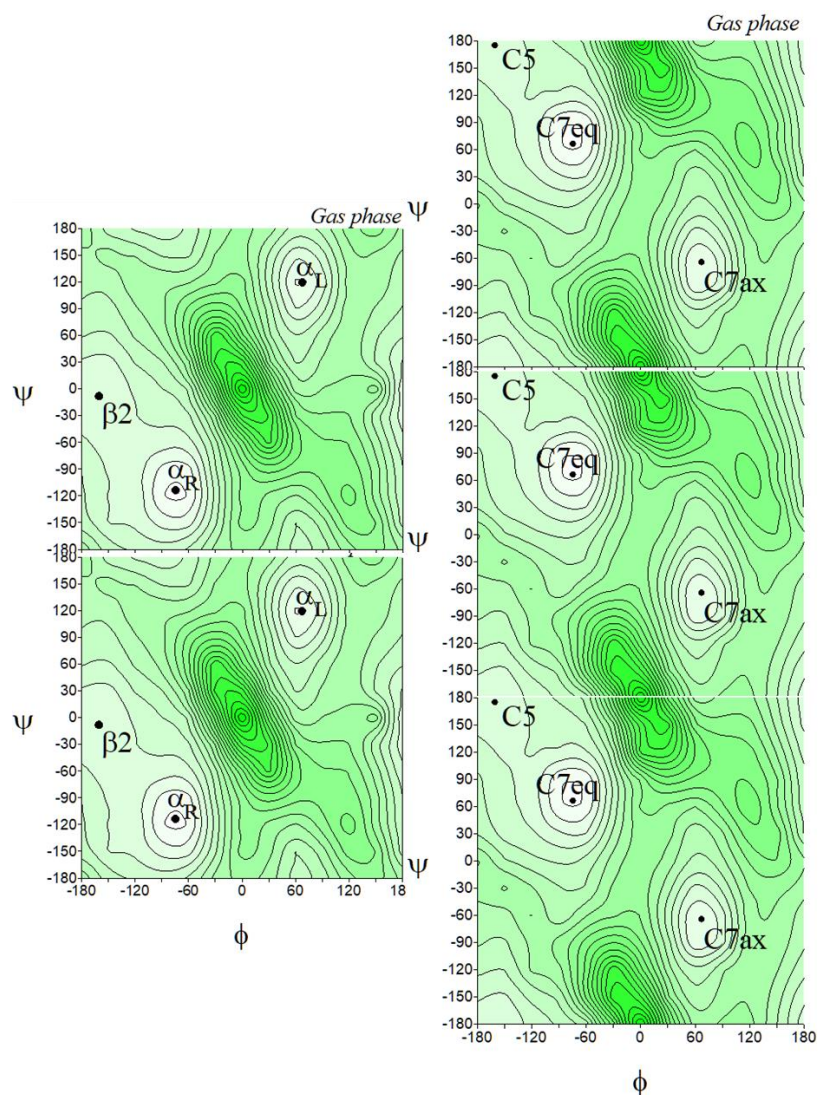

**Fig. S2.** The potential energy surfaces  $E=f(\phi, \psi)$  of Ac-L-Ala-[psi]Imz-4-Me (1, left) and Ac-L-Ala-[psi]Imz-5-Me (2, right) calculated at M06-2X/6-311++G(d,p) method in the gas phase. Energy contours are plotted every 1 kcal/mol. The darker colour indicates the high in energy regions and the lighter - low in energy regions.

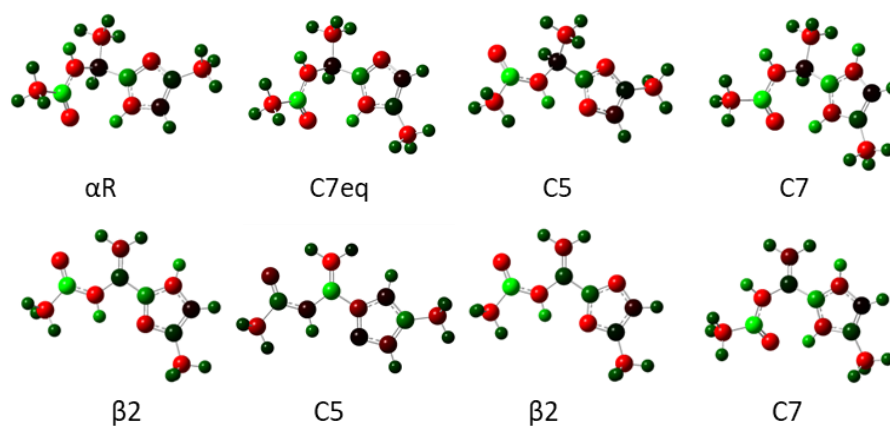

**Fig. S3** Visual representation of NBO charges for the studied compounds in lowest conformation calculated in gas phase at M06-2X/6-311++G(d,p) level of theory. The colures range from green – (positive charge) to red (negative charge)

**Table S5** The NBO charges of selected atoms (according to drawings) for the studied compounds in all conformations calculated in gas phase at M06-2X/6-311++G(d,p) level of theory

|                                                                  | O <sup>N</sup> | C <sup>N</sup> | N <sup>N</sup> | H <sup>N</sup> | N1 <sup>Imz</sup> | H1 <sup>Imz</sup> | C2 <sup>Imz</sup> | N3 <sup>Imz</sup> | H3 <sup>Imz</sup> | C4 <sup>Imz</sup> | C5 <sup>Imz</sup> |
|------------------------------------------------------------------|----------------|----------------|----------------|----------------|-------------------|-------------------|-------------------|-------------------|-------------------|-------------------|-------------------|
| <b>Ac-L-Ala-[psi]Imz-4-Me (1)</b>                                |                |                |                |                |                   |                   |                   |                   |                   |                   |                   |
| <b><math>\alpha</math>R<math>\tau</math></b>                     | -0.69          | 0.71           | -0.65          | 0.40           | -0.56             | -                 | 0.38              | -0.58             | 0.45              | -0.10             | 0.08              |
| <b><math>\alpha</math>L<math>\tau</math></b>                     | -0.69          | 0.71           | -0.65          | 0.40           | -0.53             | -                 | 0.37              | -0.56             | 0.45              | -0.09             | 0.10              |
| <b><math>\beta</math>2</b>                                       | -0.66          | 0.71           | -0.67          | 0.43           | -0.55             | -                 | 0.40              | -0.56             | 0.42              | -0.09             | 0.11              |
| <b>Ac-L-Ala-[psi]Imz-5-Me (2)</b>                                |                |                |                |                |                   |                   |                   |                   |                   |                   |                   |
| <b>C7eq</b>                                                      | -0.69          | 0.71           | -0.65          | 0.40           | -0.57             | 0.45              | 0.37              | -0.52             | -                 | -0.09             | 0.11              |
| <b>C7ax</b>                                                      | -0.69          | 0.71           | -0.65          | 0.40           | -0.58             | 0.45              | 0.37              | -0.51             | -                 | -0.09             | 0.11              |
| <b>C5</b>                                                        | -0.66          | 0.70           | -0.67          | 0.43           | -0.57             | 0.41              | 0.40              | -0.54             | -                 | -0.07             | 0.11              |
| <b>Ac-L-Ala-[psi](Imz)<sup>+</sup>-4-Me (3)</b>                  |                |                |                |                |                   |                   |                   |                   |                   |                   |                   |
| <b>C7eq</b>                                                      | -0.68          | 0.73           | -0.66          | 0.41           | -0.52             | 0.49              | 0.49              | -0.50             | 0.45              | -0.04             | 0.18              |
| <b><math>\alpha</math>R<math>\tau</math></b>                     | -0.68          | 0.73           | -0.66          | 0.41           | -0.51             | 0.45              | 0.48              | -0.50             | 0.49              | -0.03             | 0.16              |
| <b>C7ax</b>                                                      | -0.69          | 0.73           | -0.66          | 0.41           | -0.52             | 0.49              | 0.48              | -0.50             | 0.45              | -0.04             | 0.17              |
| <b><math>\alpha</math>D<math>\tau</math></b>                     | -0.69          | 0.73           | -0.66          | 0.42           | -0.51             | 0.44              | 0.48              | -0.51             | 0.50              | -0.03             | 0.16              |
| <b><math>\alpha</math>L<math>\pi</math></b>                      | -0.62          | 0.71           | -0.69          | 0.42           | -0.51             | 0.49              | 0.52              | -0.50             | 0.45              | -0.04             | 0.17              |
| <b><math>\alpha</math>D<math>\tau</math></b>                     | -0.62          | 0.71           | -0.69          | 0.42           | -0.51             | 0.45              | 0.52              | -0.50             | 0.45              | -0.03             | 0.17              |
| <b><math>\beta</math></b>                                        | -0.62          | 0.71           | -0.70          | 0.41           | -0.51             | 0.45              | 0.52              | -0.51             | 0.45              | -0.09             | 0.17              |
| <b><math>\alpha</math>R<math>\tau</math></b>                     | -0.62          | 0.71           | -0.70          | 0.41           | -0.52             | 0.45              | 0.52              | -0.50             | 0.45              | -0.09             | 0.17              |
| <b>Ac-L-Ala-[psi](Imz)<sup>-</sup>-4-Me (4)</b>                  |                |                |                |                |                   |                   |                   |                   |                   |                   |                   |
| <b>C5</b>                                                        | -0.70          | 0.69           | -0.66          | 0.44           | -0.62             | -                 | 0.30              | -0.65             | -                 | -0.14             | 0.04              |
| <b><math>\beta</math>2</b>                                       | -0.70          | 0.69           | -0.65          | 0.44           | -0.67             | -                 | 0.30              | -0.60             | -                 | -0.14             | 0.04              |
| <b>Ac-<math>\Delta</math>Ala-[psi]Imz-4-Me (5)</b>               |                |                |                |                |                   |                   |                   |                   |                   |                   |                   |
| <b><math>\beta</math>2</b>                                       | -0.63          | 0.71           | -0.66          | 0.43           | -0.59             | -                 | 0.36              | -0.54             | 0.42              | -0.07             | 0.11              |
| <b><math>\beta</math></b>                                        | -0.67          | 0.72           | -0.65          | 0.40           | -0.51             | -                 | 0.34              | -0.55             | 0.46              | -0.08             | 0.11              |
| <b>C5</b>                                                        | -0.61          | 0.70           | -0.67          | 0.40           | -0.50             | -                 | 0.35              | -0.56             | 0.42              | -0.09             | 0.11              |
| <b><math>\alpha</math></b>                                       | -0.61          | 0.71           | -0.67          | 0.40           | -0.51             | -                 | 0.36              | -0.54             | 0.42              | -0.08             | 0.11              |
| <b>Ac-<math>\Delta</math>Ala-[psi]Imz-5-Me (6)</b>               |                |                |                |                |                   |                   |                   |                   |                   |                   |                   |
| <b>C5</b>                                                        | -0.63          | 0.71           | -0.65          | 0.43           | -0.55             | 0.42              | 0.36              | -0.53             | -                 | -0.07             | 0.12              |
| <b>C7</b>                                                        | -0.67          | 0.72           | -0.65          | 0.40           | -0.56             | 0.46              | 0.33              | -0.50             | -                 | -0.08             | 0.12              |
| <b><math>\beta</math>2</b>                                       | -0.61          | 0.70           | -0.67          | 0.39           | -0.57             | 0.41              | 0.34              | -0.48             | -                 | -0.07             | 0.11              |
| <b><math>\beta</math></b>                                        | -0.61          | 0.71           | -0.68          | 0.40           | -0.55             | 0.42              | 0.35              | -0.49             | -                 | -0.07             | 0.12              |
| <b>Ac-<math>\Delta</math>Ala-[psi](Imz)<sup>-</sup>-4-Me (8)</b> |                |                |                |                |                   |                   |                   |                   |                   |                   |                   |
| <b><math>\beta</math>2</b>                                       | -0.67          | 0.69           | -0.65          | 0.44           | -0.64             | -                 | 0.26              | -0.57             | -                 | -0.12             | 0.05              |
| <b>C5</b>                                                        | -0.68          | 0.69           | -0.65          | 0.44           | -0.59             | -                 | 0.26              | -0.68             | -                 | -0.13             | 0.06              |
| <b>Ac-<math>\Delta</math>Ala-[psi](Imz)<sup>+</sup>-4-Me (7)</b> |                |                |                |                |                   |                   |                   |                   |                   |                   |                   |
| <b>C7</b>                                                        | -0.67          | 0.74           | -0.66          | 0.42           | -0.51             | 0.49              | 0.44              | -0.50             | 0.45              | -0.03             | 0.18              |
| <b><math>\alpha</math>D</b>                                      | -0.67          | 0.74           | -0.66          | 0.42           | -0.51             | 0.45              | 0.45              | -0.49             | 0.50              | -0.03             | 0.17              |
| <b>A</b>                                                         | -0.60          | 0.71           | -0.68          | 0.42           | -0.50             | 0.45              | 0.48              | -0.50             | 0.45              | -0.03             | 0.18              |
| <b><math>\beta</math></b>                                        | -0.60          | 0.72           | -0.69          | 0.42           | -0.50             | 0.45              | 0.48              | -0.49             | 0.45              | -0.03             | 0.17              |
| <b>C5</b>                                                        | -0.57          | 0.72           | -0.71          | 0.41           | -0.51             | 0.45              | 0.46              | -0.49             | 0.46              | -0.03             | 0.18              |
| <b><math>\beta</math>2</b>                                       | -0.57          | 0.72           | -0.72          | 0.41           | -0.50             | 0.45              | 0.46              | -0.50             | 0.45              | 0.03              | 0.17              |
| <b>Ac-<math>\Delta</math>Ala-[psi](Imz)<sup>-</sup>-4-Me (8)</b> |                |                |                |                |                   |                   |                   |                   |                   |                   |                   |
| <b><math>\beta</math>2</b>                                       | -0.67          | 0.69           | -0.65          | 0.44           | -0.64             | -                 | 0.26              | -0.57             | -                 | -0.12             | 0.05              |
| <b>C5</b>                                                        | -0.68          | 0.69           | -0.65          | 0.44           | -0.59             | -                 | 0.26              | -0.68             | -                 | -0.13             | 0.06              |

## References

- Allen FH, Baalham CA, Lommerse JPM, Raithby PR (1998) Carbonyl-Carbonyl Interactions can be Competitive with Hydrogen Bonds. *Acta Crystallographica Section B: Structural Science* 54 (3):320-329.
- Vargas R, Garza J, Hay BP, Dixon DA (2002) Conformational study of the alanine dipeptide at the MP2 and DFT levels. *Journal of Physical Chemistry A* 106 (13):3213-3218.
